# Supplementary material
Source: Royal Society of Chemistry journal article supplement (https://www.rsc.org/suppdata/dt/1998/3565/c805808.doc)
Supplement: Supplementary file 1 [file c805808.doc]

| Table 4. Rate Constants as a Function of Concentration of Buffer for the Different Three Steps of the Reaction of Eu3+(aq) with PAR at 25.0 oC and and Ambient Pressure ([Eu3+] 1 x 10-3 mol dm-3; [PAR] = 1 x 10-4 mol dm-3 and [NaClO4] = 0.1 mol dm-3) | | | | |  |  |  |  |
| --- | --- | --- | --- | --- | --- | --- | --- | --- |
| pH | [MES]/mol dm-3 | k1/s-1 | k2/s-1 | k3/s-1 |
| 6.15 | 0.01  0.02  0.03  0.05  0.07  0.10 | 80.4 ± 3.0  93.2 ± 1.2  108 ± 1  126 ± 2  151 ± 5  168 ± 2 | 1.98 ± 0.13  1.77 ± 0.13  1.87 ± 0.06  1.83 ± 0.13  1.87 ± 0.10  1.70 ± 0.07 | 4.55 ± 0.29  3.78 ± 0.52  3.29 ± 0.33  2.78 ± 0.18  2.13 ± 0.13  1.17 ± 0.10 |
| pH | [HEPPS]/mol dm-3 | k1/s-1 | k2/s-1 | k3/s-1 |
| 7.55 | 0.01  0.02  0.03  0.04  0.05  0.10 | 64.2 ± 0.5  95.0 ± 0.8  98.7 ± 1.2  143 ± 2  132 ± 0.3  138 ± 0.1 | 1.21 ± 0.01  1.53 ± 0.01  1.81 ± 0.09  1.71 ± 0.08  1.70 ± 0.03  1.58 ± 0.02 | 3.58 ± 0.10  3.06 ± 0.10  3.50 ± 0.30  3.41 ± 0.06  3.06 ± 0.30  2.10 ± 0.30 |
| pH | [Tris]/mol dm-3 | k1/s-1 | k2/s-1 | k3/s-1 |
| 8.10 | 0.01  0.02  0.03  0.04  0.05  0.07  0.10 | 38.6 ± 0.9  36.4 ± 1.9  35.0 ± 0.9  32.1 ± 0.6  29.4 ± 0.5  27.7 ± 0.5  22.3 ± 0.5 | 0.96 ± 0.01  0.95 ± 0.02  1.05 ± 0.01  0.98 ± 0.03  1.03 ± 0.06  1.01 ± 0.08  1.04 ± 0.04 | 2.79 ± 0.05  2.28 ± 0.04  2.87 ± 0.06  2.66 ± 0.08  2.98 ± 0.03  2.85 ± 0.07  2.56 ± 0.02 |
